# Supplementary material for: Genome Insights into Autopolyploid Evolution: A Case Study in Senecio doronicum (Asteraceae) from the Southern Alps
Source: MDPI journal article supplement (doi:10.3390/plants11091235), 2022-05-02
Supplement: s1 [file s1]

**Supplementary Table S2.** Cytotype screening of *Senecio doronicum* individuals from outside Tête Grosse (Alps du Aute Provence). Internal standard used in flow cytometry: *Petroselinum crispum* 'Champion Curler Moss' (2C = 4.45 pg).

| Sample ID | FCM ratio (standard vs. Sample) | Genome size (2C, pg) | DNA Ploidy | Lat. N   | Long. E  |
|-----------|---------------------------------|----------------------|------------|----------|----------|
| FR356     | 3.656                           | 16.27                | 8x         | 44.33665 | 6.28209  |
| FR357     | 3.697                           | 16.45                | 8x         | 44.33665 | 6.28209  |
| FR358     | 3.753                           | 16.7                 | 8x         | 44.33462 | 6.29482  |
| FR359     | 3.802                           | 16.92                | 8x         | 44.33462 | 6.29482  |
| FR360     | 3.771                           | 16.78                | 8x         | 44.3405  | 6.29449  |
| FR361     | 3.854                           | 17.15                | 8x         | 44.3405  | 6.29449  |
| FR363     | 3.737                           | 16.63                | 8x         | 44.40339 | 6.37521  |
| FR364     | 3.654                           | 16.26                | 8x         | 44.39758 | 6.38375  |
| FR365     | 3.584                           | 15.95                | 8x         | 44.39758 | 6.38375  |
| FR379     | 3.717                           | 16.54                | 8x         | 44.40943 | 6.38709  |
| FR380     | 3.715                           | 16.53                | 8x         | 44.40943 | 6.38709  |
| FR386     | 3.742                           | 16.65                | 8x         | 44.332   | 6.29235  |
| FR387     | 3.665                           | 16.31                | 8x         | 44.332   | 6.29235  |
| FR417     | 3.654                           | 16.26                | 8x         | 44.31216 | 6.43589  |
| FR435     | 3.910                           | 17.4                 | 8x         | 44.28397 | 6.43458  |
| FR459     | 3.807                           | 16.94                | 8x         | 44.72351 | 6.31857  |
| FR463     | 3.757                           | 16.72                | 8x         | 44.72623 | 6.32373  |
| FR472     | 3.818                           | 16.99                | 8x         | 44.72993 | 6.32625  |
| FR474     | 3.838                           | 17.08                | 8x         | 44.72324 | 6.3443   |
| FR475     | 3.822                           | 17.01                | 8x         | 44.72992 | 6.32625  |
| FR476     | 3.791                           | 16.87                | 8x         | 44.72099 | 6.34373  |
| FR478     | 3.784                           | 16.84                | 8x         | 44.72046 | 6.34202  |
| FR479     | 3.766                           | 16.76                | 8x         | 44.72046 | 6.34202  |
| FR482     | 3.816                           | 16.98                | 8x         | 44.57619 | 6.33727  |
| FR485     | 3.865                           | 17.2                 | 8x         | 44.58065 | 6.33232  |
| FR601     | 3.719                           | 16.55                | 8x         | 44.06522 | 6.40574  |
| FR626     | 1.921                           | 8.55                 | 4x         | 44.25249 | 6.71275  |
| FR627     | 1.935                           | 8.61                 | 4x         | 44.25315 | 6.71517  |
| FR653     | 1.966                           | 8.75                 | 4x         | 44.3197  | 6.69477  |
| FR654     | 1.989                           | 8.85                 | 4x         | 44.31719 | 6.690034 |
| FR671     | 3.625                           | 16.13                | 8x         | 44.20338 | 7.1513   |
| FR696     | 3.510                           | 15.62                | 8x         | 44.34501 | 6.80097  |
| FR711a    | 3.589                           | 15.97                | 8x         | 44.32002 | 6.43188  |
| FR715     | 3.782                           | 16.83                | 8x         | 44.33681 | 6.2822   |
| FR720     | 3.546                           | 15.78                | 8x         | 44.3342  | 6.29422  |
| FR721     | 3.578                           | 15.92                | 8x         | 44.34052 | 6.29454  |
