# Supplementary material for: Genome Insights into Autopolyploid Evolution: A Case Study in Senecio doronicum (Asteraceae) from the Southern Alps
Source: MDPI journal article supplement (doi:10.3390/plants11091235), 2022-05-02
Supplement: s1 [file s1]

**Supplementary Table S1.** Cytotype screening of *Senecio doronicum* individuals from Tête Grosse (Alps du Aute Provence. Internal standard used in flow cytometry: *Petroselinum crispum* 'Champion Curler Moss' (2C = 4.45 pg).

| Sample ID (Code TG) | FCM ratio<br>(standard vs.<br>Sample) | Genome size<br>(2C, pg) | DNA Ploidy |
|---------------------|---------------------------------------|-------------------------|------------|
| 1R                  | 3.748                                 | 16.679                  | 8x         |
| 2R                  | 3.718                                 | 16.545                  | 8x         |
| 3R                  | 3.665                                 | 16.309                  | 8x         |
| 4R                  | 3.783                                 | 16.834                  | 8x         |
| 5R                  | 3.679                                 | 16.372                  | 8x         |
| 6R                  | 3.688                                 | 16.412                  | 8x         |
| 7R                  | 3.723                                 | 16.567                  | 8x         |
| 8R                  | 3.721                                 | 16.558                  | 8x         |
| 9                   | 3.763                                 | 16.745                  | 8x         |
| 10                  | 3.763                                 | 16.745                  | 8x         |
| 11                  | 3.763                                 | 16.745                  | 8x         |
| 12                  | 3.763                                 | 16.745                  | 8x         |
| 13                  | 3.763                                 | 16.745                  | 8x         |
| 14R                 | 3.715                                 | 16.532                  | 8x         |
| 15                  | 3.788                                 | 16.857                  | 8x         |
| 16                  | 3.788                                 | 16.857                  | 8x         |
| 18R                 | 3.769                                 | 16.772                  | 8x         |
| 19                  | 3.788                                 | 16.857                  | 8x         |
| 20                  | 3.788                                 | 16.857                  | 8x         |
| 21                  | 3.788                                 | 16.857                  | 8x         |
| 22                  | 3.730                                 | 16.599                  | 8x         |
| 23                  | 3.730                                 | 16.599                  | 8x         |
| 24R                 | 3.801                                 | 16.914                  | 8x         |
| 25                  | 3.730                                 | 16.599                  | 8x         |
| 26                  | 3.730                                 | 16.599                  | 8x         |
| 27                  | 3.730                                 | 16.599                  | 8x         |
| 28R                 | 3.775                                 | 16.799                  | 8x         |
| 29                  | 3.810                                 | 16.955                  | 8x         |
| 30                  | 3.810                                 | 16.955                  | 8x         |
| 31                  | 3.810                                 | 16.955                  | 8x         |
| 32                  | 3.810                                 | 16.955                  | 8x         |
| 33                  | 3.810                                 | 16.955                  | 8x         |
| 34                  | 3.867                                 | 17.208                  | 8x         |
| 35                  | 3.867                                 | 17.208                  | 8x         |
| 36                  | 3.867                                 | 17.208                  | 8x         |
| 37                  | 3.867                                 | 17.208                  | 8x         |
| 38                  | 3.867                                 | 17.208                  | 8x         |

|     |       |        |    |
|-----|-------|--------|----|
| 39R | 3.720 | 16.554 | 8x |
| 41R | 3.683 | 16.389 | 8x |
| 43  | 3.804 | 16.928 | 8x |
| 44  | 3.804 | 16.928 | 8x |
| 46  | 3.804 | 16.928 | 8x |
| 47R | 3.785 | 16.843 | 8x |
| 48  | 3.835 | 17.066 | 8x |
| 51  | 3.590 | 15.976 | 8x |
| 52  | 3.572 | 15.895 | 8x |
| 53  | 3.572 | 15.895 | 8x |
| 54  | 3.497 | 15.562 | 8x |
| 55  | 3.497 | 15.562 | 8x |
| 56  | 3.497 | 15.562 | 8x |
| 57  | 3.497 | 15.562 | 8x |
| 58  | 3.497 | 15.562 | 8x |
| 59  | 3.502 | 15.584 | 8x |
| 60  | 3.502 | 15.584 | 8x |
| 61R | 3.735 | 16.621 | 8x |
| 62  | 3.502 | 15.584 | 8x |
| 63  | 3.502 | 15.584 | 8x |
| 64R | 3.745 | 16.665 | 8x |
| 65  | 3.502 | 15.584 | 8x |
| 66  | 3.593 | 15.989 | 8x |
| 67  | 3.593 | 15.989 | 8x |
| 68  | 3.593 | 15.989 | 8x |
| 69  | 3.593 | 15.989 | 8x |
| 70R | 3.550 | 15.798 | 8x |
| 71  | 3.593 | 15.989 | 8x |
| 72  | 3.540 | 15.753 | 8x |
| 73  | 3.540 | 15.753 | 8x |
| 74  | 3.540 | 15.753 | 8x |
| 75  | 3.540 | 15.753 | 8x |
| 76  | 3.540 | 15.753 | 8x |
| 77  | 3.609 | 16.060 | 8x |
| 78  | 3.609 | 16.060 | 8x |
| 79  | 3.609 | 16.060 | 8x |
| 80  | 3.609 | 16.060 | 8x |
| 81  | 3.609 | 16.060 | 8x |
| 82  | 3.473 | 15.455 | 8x |
| 83  | 3.473 | 15.455 | 8x |
| 84  | 3.473 | 15.455 | 8x |
| 85  | 3.473 | 15.455 | 8x |
| 86  | 3.473 | 15.455 | 8x |
| 87  | 3.572 | 15.895 | 8x |
| 88  | 3.572 | 15.895 | 8x |
| 89  | 3.590 | 15.976 | 8x |

|       |       |        |    |
|-------|-------|--------|----|
| 90    | 3.590 | 15.976 | 8x |
| 91    | 3.590 | 15.976 | 8x |
| 92    | 3.590 | 15.976 | 8x |
| 93    | 3.595 | 15.998 | 8x |
| 94    | 3.572 | 15.895 | 8x |
| 95    | 3.497 | 15.562 | 8x |
| 96    | 3.497 | 15.562 | 8x |
| 97    | 3.497 | 15.562 | 8x |
| 98    | 3.497 | 15.562 | 8x |
| 99    | 3.497 | 15.562 | 8x |
| 100R  | 3.721 | 16.558 | 8x |
| 101R  | 3.827 | 17.030 | 8x |
| 103   | 3.578 | 15.922 | 8x |
| 104   | 3.578 | 15.922 | 8x |
| 105   | 3.578 | 15.922 | 8x |
| 106   | 3.578 | 15.922 | 8x |
| 107   | 3.578 | 15.922 | 8x |
| 108   | 3.639 | 16.194 | 8x |
| 109   | 3.639 | 16.194 | 8x |
| 110   | 3.639 | 16.194 | 8x |
| 111   | 3.639 | 16.194 | 8x |
| 112   | 3.639 | 16.194 | 8x |
| 113   | 3.603 | 16.033 | 8x |
| 114   | 3.603 | 16.033 | 8x |
| 115   | 3.603 | 16.033 | 8x |
| 115   | 1.998 | 8.891  | 4x |
| 116   | 3.603 | 16.033 | 8x |
| 117   | 3.603 | 16.033 | 8x |
| 118   | 3.563 | 15.855 | 8x |
| 119   | 3.563 | 15.855 | 8x |
| 120RA | 3.775 | 16.799 | 8x |
| 120RB | 3.817 | 16.986 | 8x |
| 121R  | 3.804 | 16.928 | 8x |
| 122   | 3.563 | 15.855 | 8x |
| 123   | 3.563 | 15.855 | 8x |
| 124   | 3.719 | 16.550 | 8x |
| 125   | 3.719 | 16.550 | 8x |
| 126   | 3.719 | 16.550 | 8x |
| 127   | 3.719 | 16.550 | 8x |
| 128   | 3.719 | 16.550 | 8x |
| 129   | 3.766 | 16.759 | 8x |
| 130   | 3.766 | 16.759 | 8x |
| 131   | 3.766 | 16.759 | 8x |
| 132   | 3.766 | 16.759 | 8x |
| 133   | 3.766 | 16.759 | 8x |
| 134   | 3.700 | 16.465 | 8x |

|      |       |        |    |
|------|-------|--------|----|
| 135  | 3.700 | 16.465 | 8x |
| 136  | 3.700 | 16.465 | 8x |
| 137  | 3.700 | 16.465 | 8x |
| 138R | 3.725 | 16.576 | 8x |
| 139R | 3.867 | 17.208 | 8x |
| 141  | 3.734 | 16.616 | 8x |
| 142  | 3.734 | 16.616 | 8x |
| 143  | 3.734 | 16.616 | 8x |
| 144  | 3.734 | 16.616 | 8x |
| 145R | 3.854 | 17.150 | 8x |
| 146  | 3.852 | 17.141 | 8x |
| 147  | 3.852 | 17.141 | 8x |
| 148  | 3.852 | 17.141 | 8x |
| 149  | 3.852 | 17.141 | 8x |
| 150  | 3.852 | 17.141 | 8x |
| 151  | 3.690 | 16.421 | 8x |
| 152  | 3.690 | 16.421 | 8x |
| 153  | 3.690 | 16.421 | 8x |
| 154  | 3.690 | 16.421 | 8x |
| 155  | 3.721 | 16.558 | 8x |
| 156  | 3.721 | 16.558 | 8x |
| 157  | 3.721 | 16.558 | 8x |
| 158  | 3.721 | 16.558 | 8x |
| 159  | 3.721 | 16.558 | 8x |
| 161  | 3.660 | 16.287 | 8x |
| 162  | 3.660 | 16.287 | 8x |
| 163  | 3.660 | 16.287 | 8x |
| 164R | 3.779 | 16.817 | 8x |
| 165R | 3.780 | 16.821 | 8x |
| 166  | 3.660 | 16.287 | 8x |
| 167  | 3.743 | 16.656 | 8x |
| 168  | 3.743 | 16.656 | 8x |
| 169  | 3.743 | 16.656 | 8x |
| 170  | 3.743 | 16.656 | 8x |
| 171  | 3.743 | 16.656 | 8x |
| 172R | 3.706 | 16.492 | 8x |
| 173R | 3.806 | 16.937 | 8x |
| 174R | 3.699 | 16.461 | 8x |
| 175  | 3.677 | 16.363 | 8x |
| 176  | 3.677 | 16.363 | 8x |
| 177  | 3.677 | 16.363 | 8x |
| 178  | 3.677 | 16.363 | 8x |
| 179  | 3.677 | 16.363 | 8x |
| 180  | 3.633 | 16.167 | 8x |
| 181  | 3.633 | 16.167 | 8x |
| 182  | 3.633 | 16.167 | 8x |

|      |       |        |    |
|------|-------|--------|----|
| 183  | 3.633 | 16.167 | 8x |
| 184R | 3.782 | 16.830 | 8x |
| 186  | 3.633 | 16.167 | 8x |
| 187  | 3.737 | 16.630 | 8x |
| 188  | 3.737 | 16.630 | 8x |
| 189  | 3.737 | 16.630 | 8x |
| 190  | 3.737 | 16.630 | 8x |
| 191  | 3.737 | 16.630 | 8x |
| 192  | 3.460 | 15.397 | 8x |
| 193  | 3.460 | 15.397 | 8x |
| 194  | 3.460 | 15.397 | 8x |
| 195  | 3.460 | 15.397 | 8x |
| 196  | 3.460 | 15.397 | 8x |
| 197  | 3.571 | 15.891 | 8x |
| 198  | 3.571 | 15.891 | 8x |
| 199  | 3.571 | 15.891 | 8x |
| 200  | 3.494 | 15.548 | 8x |
| 202  | 3.478 | 15.477 | 8x |
| 203  | 3.472 | 15.450 | 8x |
| 204  | 3.472 | 15.450 | 8x |
| 205  | 3.500 | 15.575 | 8x |
| 206  | 3.494 | 15.548 | 8x |
| 207  | 3.612 | 16.073 | 8x |
| 208  | 3.478 | 15.477 | 8x |
| 209  | 3.574 | 15.904 | 8x |
| 210  | 3.574 | 15.904 | 8x |
| 211  | 3.612 | 16.073 | 8x |
| 212  | 3.567 | 15.873 | 8x |
| 213  | 3.654 | 16.260 | 8x |
| 214  | 3.654 | 16.260 | 8x |
| 215  | 3.500 | 15.575 | 8x |
| 216  | 3.654 | 16.260 | 8x |
| 217  | 3.571 | 15.891 | 8x |
| 218  | 3.743 | 16.656 | 8x |
| 219  | 3.571 | 15.891 | 8x |
| 220  | 3.574 | 15.904 | 8x |
| 221  | 3.494 | 15.548 | 8x |
| 222  | 3.724 | 16.572 | 8x |
| 223  | 3.457 | 15.384 | 8x |
| 224  | 3.472 | 15.450 | 8x |
| 225  | 3.574 | 15.904 | 8x |
| 226  | 3.457 | 15.384 | 8x |
| 227  | 3.472 | 15.450 | 8x |
| 228  | 3.654 | 16.260 | 8x |
| 229  | 3.567 | 15.873 | 8x |
| 230  | 3.567 | 15.873 | 8x |

|      |       |        |    |
|------|-------|--------|----|
| 231  | 3.743 | 16.656 | 8x |
| 232  | 3.478 | 15.477 | 8x |
| 233  | 3.567 | 15.873 | 8x |
| 234  | 3.500 | 15.575 | 8x |
| 235  | 3.478 | 15.477 | 8x |
| 236  | 3.457 | 15.384 | 8x |
| 237  | 3.457 | 15.384 | 8x |
| 238  | 3.654 | 16.260 | 8x |
| 239  | 3.457 | 15.384 | 8x |
| 240  | 3.494 | 15.548 | 8x |
| 241  | 3.472 | 15.450 | 8x |
| 242  | 3.494 | 15.548 | 8x |
| 243  | 3.478 | 15.477 | 8x |
| 244  | 3.500 | 15.575 | 8x |
| 245  | 3.500 | 15.575 | 8x |
| 246  | 3.612 | 16.073 | 8x |
| 248  | 3.612 | 16.073 | 8x |
| 249  | 3.612 | 16.073 | 8x |
| 250  | 3.724 | 16.572 | 8x |
| 251  | 3.793 | 16.879 | 8x |
| 252  | 3.724 | 16.572 | 8x |
| 253  | 3.766 | 16.759 | 8x |
| 254  | 3.793 | 16.879 | 8x |
| 256  | 3.724 | 16.572 | 8x |
| 257  | 3.766 | 16.759 | 8x |
| 258  | 3.766 | 16.759 | 8x |
| 259  | 3.793 | 16.879 | 8x |
| 260  | 3.743 | 16.656 | 8x |
| 261  | 3.754 | 16.705 | 8x |
| 270  | 3.754 | 16.705 | 8x |
| 271  | 3.766 | 16.759 | 8x |
| 272  | 3.766 | 16.759 | 8x |
| 274  | 3.743 | 16.656 | 8x |
| 275  | 3.724 | 16.572 | 8x |
| 277  | 3.754 | 16.705 | 8x |
| 278  | 3.754 | 16.705 | 8x |
| 279  | 3.793 | 16.879 | 8x |
| 280  | 3.754 | 16.705 | 8x |
| 301R | 3.903 | 17.368 | 8x |
| 302R | 3.938 | 17.524 | 8x |
| 303R | 3.705 | 16.487 | 8x |
| 304R | 3.882 | 17.275 | 8x |
| 306R | 3.874 | 17.239 | 8x |
| 307R | 3.789 | 16.861 | 8x |
| 308  | 3.864 | 17.195 | 8x |
| 309  | 3.759 | 16.728 | 8x |

|      |       |        |    |
|------|-------|--------|----|
| 310R | 3.658 | 16.278 | 8x |
| 311  | 3.752 | 16.696 | 8x |
| 312  | 3.984 | 17.729 | 8x |
| 313  | 3.705 | 16.487 | 8x |
| 315  | 3.690 | 16.421 | 8x |
| 318  | 3.508 | 15.611 | 8x |
| 320  | 3.787 | 16.852 | 8x |
| 322  | 3.865 | 17.199 | 8x |
| 324  | 3.853 | 17.146 | 8x |
| 325  | 3.776 | 16.803 | 8x |
| 326  | 3.774 | 16.794 | 8x |
| 327R | 3.732 | 16.607 | 8x |
| 328  | 3.744 | 16.661 | 8x |
| 329R | 2.039 | 9.074  | 4x |
| 333  | 3.609 | 16.060 | 8x |
| 335R | 3.980 | 17.711 | 8x |
| 337R | 2.888 | 12.852 | 6x |
| 338R | 3.686 | 16.403 | 8x |
| 340R | 3.792 | 16.874 | 8x |
| 342  | 3.706 | 16.492 | 8x |
| 343R | 2.023 | 9.002  | 4x |
| 344R | 1.976 | 8.793  | 4x |
| 345R | 2.046 | 9.105  | 4x |
| 347  | 2.012 | 8.953  | 4x |
| 348R | 2.058 | 9.158  | 4x |
| 351R | 3.816 | 16.981 | 8x |
| 352  | 3.668 | 16.323 | 8x |
| 353  | 3.789 | 16.861 | 8x |
| 354  | 3.516 | 15.646 | 8x |
| 355R | 2.008 | 8.936  | 4x |
| 357R | 2.014 | 8.962  | 4x |
| 358  | 2.034 | 9.051  | 4x |
| 359  | 2.003 | 8.913  | 4x |
| 360  | 1.930 | 8.589  | 4x |
| 362  | 2.057 | 9.154  | 4x |
| 363R | 2.068 | 9.203  | 4x |
| 364  | 2.024 | 9.007  | 4x |
| 365R | 2.024 | 9.007  | 4x |
| 366R | 2.036 | 9.060  | 4x |
| 367R | 2.009 | 8.940  | 4x |
| 368  | 1.997 | 8.887  | 4x |
| 369  | 1.973 | 8.780  | 4x |
| 370  | 2.018 | 8.980  | 4x |
| 371  | 1.988 | 8.847  | 4x |
| 372  | 2.043 | 9.091  | 4x |
| 373  | 2.041 | 9.082  | 4x |

|      |       |        |    |
|------|-------|--------|----|
| 374  | 2.009 | 8.940  | 4x |
| 377  | 3.878 | 17.257 | 8x |
| 380  | 3.872 | 17.230 | 8x |
| 381  | 3.756 | 16.714 | 8x |
| 387  | 3.900 | 17.355 | 8x |
| 388  | 3.742 | 16.652 | 8x |
| 389  | 3.745 | 16.665 | 8x |
| 390  | 3.688 | 16.412 | 8x |
| 391  | 3.724 | 16.572 | 8x |
| 392  | 3.627 | 16.140 | 8x |
| 392  | 3.832 | 17.052 | 8x |
| 393  | 3.690 | 16.421 | 8x |
| 394  | 3.716 | 16.536 | 8x |
| 395  | 3.820 | 16.999 | 8x |
| 396  | 3.753 | 16.701 | 8x |
| 397  | 3.832 | 17.052 | 8x |
| 398  | 3.767 | 16.763 | 8x |
| 399  | 3.519 | 15.660 | 8x |
| 400  | 3.747 | 16.674 | 8x |
| 401  | 3.529 | 15.704 | 8x |
| 403  | 1.979 | 8.807  | 4x |
| 406  | 3.737 | 16.630 | 8x |
| 408  | 3.468 | 15.433 | 8x |
| 409  | 3.704 | 16.483 | 8x |
| 410  | 3.823 | 17.012 | 8x |
| 411  | 3.570 | 15.887 | 8x |
| 412  | 1.998 | 8.891  | 4x |
| 413R | 2.006 | 8.927  | 4x |
| 414  | 3.711 | 16.514 | 8x |
| 415  | 2.062 | 9.176  | 4x |
| 416  | 2.048 | 9.114  | 4x |
| 417  | 2.044 | 9.096  | 4x |
| 420  | 2.016 | 8.971  | 4x |
| 421  | 1.905 | 8.477  | 4x |
| 422  | 2.007 | 8.931  | 4x |
| 423  | 1.987 | 8.842  | 4x |
| 424  | 1.969 | 8.762  | 4x |
| 426  | 2.007 | 8.931  | 4x |
| 427  | 2.028 | 9.025  | 4x |
| 428  | 2.016 | 8.971  | 4x |
| 430  | 1.958 | 8.713  | 4x |
| 431  | 1.872 | 8.330  | 4x |
| 432R | 2.035 | 9.056  | 4x |
| 439R | 1.952 | 8.686  | 4x |
| 442  | 2.015 | 8.967  | 4x |
| 443R | 1.959 | 8.718  | 4x |



|      |       |       |    |
|------|-------|-------|----|
| 444  | 2.000 | 8.900 | 4x |
| 445  | 2.008 | 8.936 | 4x |
| 446  | 2.028 | 9.025 | 4x |
| 447  | 2.000 | 8.900 | 4x |
| 448  | 1.963 | 8.735 | 4x |
| 449  | 2.038 | 9.069 | 4x |
| 450  | 1.968 | 8.758 | 4x |
| 453  | 2.046 | 9.105 | 4x |
| 456  | 2.003 | 8.913 | 4x |
| 457  | 2.032 | 9.042 | 4x |
| 458  | 2.013 | 8.958 | 4x |
| 459  | 2.054 | 9.140 | 4x |
| 460R | 2.059 | 9.163 | 4x |
| 462  | 2.014 | 8.962 | 4x |
| 463  | 1.963 | 8.735 | 4x |
| 464  | 1.950 | 8.678 | 4x |
| 465  | 2.015 | 8.967 | 4x |
| 466  | 2.022 | 8.998 | 4x |
| 467  | 2.009 | 8.940 | 4x |
| 468R | 2.041 | 9.082 | 4x |
| 470  | 2.038 | 9.069 | 4x |
| 471  | 2.005 | 8.922 | 4x |
| 472  | 2.001 | 8.904 | 4x |
| 473  | 2.029 | 9.029 | 4x |
| 474R | 1.994 | 8.873 | 4x |
| 475  | 1.977 | 8.798 | 4x |
| 476  | 2.011 | 8.949 | 4x |
| 477  | 1.997 | 8.887 | 4x |
| 478  | 2.024 | 9.007 | 4x |
| 479  | 2.036 | 9.060 | 4x |
| 480  | 1.976 | 8.793 | 4x |
| 481  | 2.000 | 8.900 | 4x |
| 482  | 2.001 | 8.904 | 4x |
| 484  | 2.050 | 9.123 | 4x |
| 485  | 2.018 | 8.980 | 4x |
| 486  | 2.020 | 8.989 | 4x |
| 489  | 2.023 | 9.002 | 4x |
| 490  | 2.009 | 8.940 | 4x |
| 491  | 1.996 | 8.882 | 4x |
| 493  | 2.035 | 9.056 | 4x |
| 494  | 2.017 | 8.976 | 4x |
| 495  | 1.973 | 8.780 | 4x |
| 496  | 1.996 | 8.882 | 4x |
| 497  | 1.986 | 8.838 | 4x |
| 498  | 2.032 | 9.042 | 4x |
| 499  | 1.935 | 8.611 | 4x |

|      |       |        |    |
|------|-------|--------|----|
| 500  | 2.054 | 9.140  | 4x |
| 501  | 2.038 | 9.069  | 4x |
| 502  | 1.952 | 8.686  | 4x |
| 503  | 1.945 | 8.655  | 4x |
| 504  | 1.903 | 8.468  | 4x |
| 505  | 1.983 | 8.824  | 4x |
| 506  | 2.794 | 12.433 | 6x |
| 507  | 2.755 | 12.260 | 6x |
| 508  | 2.041 | 9.082  | 4x |
| 509  | 1.946 | 8.660  | 4x |
| 510  | 1.946 | 8.660  | 4x |
| 511  | 1.946 | 8.660  | 4x |
| 513  | 1.946 | 8.660  | 4x |
| 514  | 1.907 | 8.486  | 4x |
| 515  | 2.017 | 8.976  | 4x |
| 516  | 2.040 | 9.078  | 4x |
| 517  | 1.963 | 8.735  | 4x |
| 518  | 1.998 | 8.891  | 4x |
| 519  | 2.027 | 9.020  | 4x |
| 520  | 1.975 | 8.789  | 4x |
| 521R | 1.970 | 8.767  | 4x |
| 522  | 2.035 | 9.056  | 4x |
| 523  | 1.963 | 8.735  | 4x |
| 524  | 1.981 | 8.815  | 4x |
| 526  | 2.058 | 9.158  | 4x |
| 527  | 2.058 | 9.158  | 4x |
| 528  | 3.765 | 16.754 | 8x |
| 529R | 2.056 | 9.149  | 4x |
| 530  | 2.076 | 9.238  | 4x |
| 531  | 1.992 | 8.864  | 4x |
| 532  | 2.028 | 9.025  | 4x |
| 535  | 3.685 | 16.398 | 8x |
| 539R | 2.000 | 8.900  | 4x |
| 540  | 3.777 | 16.808 | 8x |
| 541  | 3.708 | 16.501 | 8x |
| 542  | 3.708 | 16.501 | 8x |
| 543  | 3.765 | 16.754 | 8x |
| 544  | 3.744 | 16.661 | 8x |
| 545  | 2.012 | 8.953  | 4x |
| 546  | 3.584 | 15.949 | 8x |
| 548  | 3.763 | 16.745 | 8x |
| 549R | 2.013 | 8.958  | 4x |
| 550  | 3.687 | 16.407 | 8x |
| 551  | 2.027 | 9.020  | 4x |
| 552  | 2.034 | 9.051  | 4x |
| 553  | 3.620 | 16.109 | 8x |

|      |       |        |    |
|------|-------|--------|----|
| 554  | 3.643 | 16.211 | 8x |
| 555  | 3.887 | 17.297 | 8x |
| 556  | 3.758 | 16.723 | 8x |
| 558  | 3.830 | 17.044 | 8x |
| 559  | 3.733 | 16.612 | 8x |
| 560a | 1.976 | 8.793  | 4x |
| 560b | 3.841 | 17.092 | 8x |
| 561  | 1.978 | 8.802  | 4x |
| 563  | 3.857 | 17.164 | 8x |
| 565  | 3.533 | 15.722 | 8x |
| 567R | 1.983 | 8.824  | 4x |
| 568  | 3.701 | 16.469 | 8x |
| 570  | 3.971 | 17.671 | 8x |
| 571  | 3.757 | 16.719 | 8x |
| 572  | 1.952 | 8.686  | 4x |
| 573  | 3.742 | 16.652 | 8x |
| 574  | 3.753 | 16.701 | 8x |
| 576  | 3.709 | 16.505 | 8x |
| 578  | 3.808 | 16.946 | 8x |
| 579  | 3.742 | 16.652 | 8x |
| 580  | 3.800 | 16.910 | 8x |
| 583  | 3.759 | 16.728 | 8x |
| 585  | 3.944 | 17.551 | 8x |
| 586  | 3.902 | 17.364 | 8x |
| 591  | 3.727 | 16.585 | 8x |
| 592  | 3.716 | 16.536 | 8x |
| 593  | 4.011 | 17.849 | 8x |
| 594  | 3.793 | 16.879 | 8x |
| 595  | 3.848 | 17.124 | 8x |
| 597  | 3.551 | 15.802 | 8x |
| 598  | 3.633 | 16.167 | 8x |
| 599  | 3.764 | 16.750 | 8x |
| 600  | 3.662 | 16.296 | 8x |
| 601  | 3.730 | 16.599 | 8x |
| 602  | 2.002 | 8.909  | 4x |
| 603  | 3.716 | 16.536 | 8x |
| 604  | 1.967 | 8.753  | 4x |
| 605  | 2.029 | 9.029  | 4x |
| 606  | 2.039 | 9.074  | 4x |
| 607  | 2.032 | 9.042  | 4x |
| 608  | 2.056 | 9.149  | 4x |
| 609  | 1.975 | 8.789  | 4x |
| 610  | 2.003 | 8.913  | 4x |
| 613  | 3.691 | 16.425 | 8x |
| 700R | 2.040 | 9.078  | 4x |
| 702  | 1.971 | 8.771  | 4x |

|     |       |       |    |
|-----|-------|-------|----|
| 703 | 1.946 | 8.660 | 4x |
| 703 | 1.973 | 8.780 | 4x |
| 705 | 2.058 | 9.158 | 4x |
