# Supplementary material for: Genome Insights into Autopolyploid Evolution: A Case Study in Senecio doronicum (Asteraceae) from the Southern Alps
Source: MDPI journal article supplement (doi:10.3390/plants11091235), 2022-05-02
Supplement: s1 [file s1]

**Supplementary Table S5.** Comparison of genome compositions between individuals of the same cytotype using paired Wilcoxon tests. All samples were from Tete Grosse with the exception of individuals FR626/FR627 and FR475, which were from Allos and Orcières respectively.

| <b>Cytotype</b>    | <b>Comparison</b> | <b>Wilcoxon test statistic (V)</b> | <b>p-value</b> |
|--------------------|-------------------|------------------------------------|----------------|
| <b>Tetraploids</b> | TG370-TG422       | 43                                 | 0.791          |
|                    | TG370-TG444       | 44                                 | 0.733          |
|                    | TG370-FR626       | 31                                 | 0.569          |
|                    | TG370-FR627       | 53                                 | 0.3            |
|                    | TG444-FR626       | 35                                 | 0.791          |
|                    | TG444-TG422       | 43                                 | 0.791          |
|                    | TG444-FR627       | 27                                 | 0.38           |
|                    | TG422-FR626       | 26                                 | 0.339          |
|                    | TG422-FR627       | 42                                 | 0.85           |
|                    | FR627-FR626       | 32                                 | 0.622          |
| <b>Hexaploids</b>  | TG337R-TG506      | 44                                 | 0.733          |
|                    | TG337R-TG507      | 47                                 | 0.569          |
|                    | TG506-TG507       | 43                                 | 0.791          |
| <b>Octoploids</b>  | TG84-TG137        | 39                                 | 0.625          |
|                    | TG84-TG237        | 44                                 | 0.35           |
|                    | TG84-FR475        | 39                                 | 0.625          |
|                    | TG237-FR475       | 35                                 | 0.894          |
|                    | TG237-TG137       | 24                                 | 0.45           |
|                    | TG137-FR475       | 38                                 | 0.689          |
