# Supplementary material for: Genome Insights into Autopolyploid Evolution: A Case Study in Senecio doronicum (Asteraceae) from the Southern Alps
Source: MDPI journal article supplement (doi:10.3390/plants11091235), 2022-05-02
Supplement: s1 [file s1]

**Supplementary Table S3.** Details per individual of genome skimming and individual clustering analysis of specimens analysed from Tête Grosse (TG) and outside this population (FR).

| Individual<br>code | GS         | Chrom.         | Sequencing    | Individual clustering |                    |
|--------------------|------------|----------------|---------------|-----------------------|--------------------|
|                    | 1C<br>(Mb) | number<br>(2n) | run<br>number | No.<br>reads          | Coverage (×<br>1C) |
| TG84               | 8,097.84   | 80             | SAMN25529504  | 1,200,000             | 0.022 ×            |
| TG137              | 8,097.84   | 80             | SAMN25529505  | 1,200,000             | 0.022 ×            |
| TG237              | 8,097.84   | 80             | SAMN25529506  | 1,200,000             | 0.022 ×            |
| FR475              | 8,097.84   | 80             | SAMN25529513  | 1,200,000             | 0.022 ×            |
| TG337R             | 6,357      | 60             | SAMN25529507  | 1,200,000             | 0.028 ×            |
| TG506              | 6,357      | 60             | SAMN25529511  | 1,200,000             | 0.028 ×            |
| TG507              | 6,357      | 60             | SAMN25529512  | 1,200,000             | 0.028 ×            |
| TG370              | 4,205.4    | 40             | SAMN25529508  | 1,200,000             | 0.043 ×            |
| TG422              | 4,205.4    | 40             | SAMN25529509  | 1,200,000             | 0.043 ×            |
| TG444              | 4,205.4    | 40             | SAMN25529510  | 1,200,000             | 0.043 ×            |
| FR626              | 4,205.4    | 40             | SAMN25529514  | 1,200,000             | 0.043 ×            |
| FR627              | 4,205.4    | 40             | SAMN25529515  | 1,200,000             | 0.043 ×            |
