# Supplementary material for: Genome Insights into Autopolyploid Evolution: A Case Study in Senecio doronicum (Asteraceae) from the Southern Alps
Source: MDPI journal article supplement (doi:10.3390/plants11091235), 2022-05-02
Supplement: s1 [file s1]

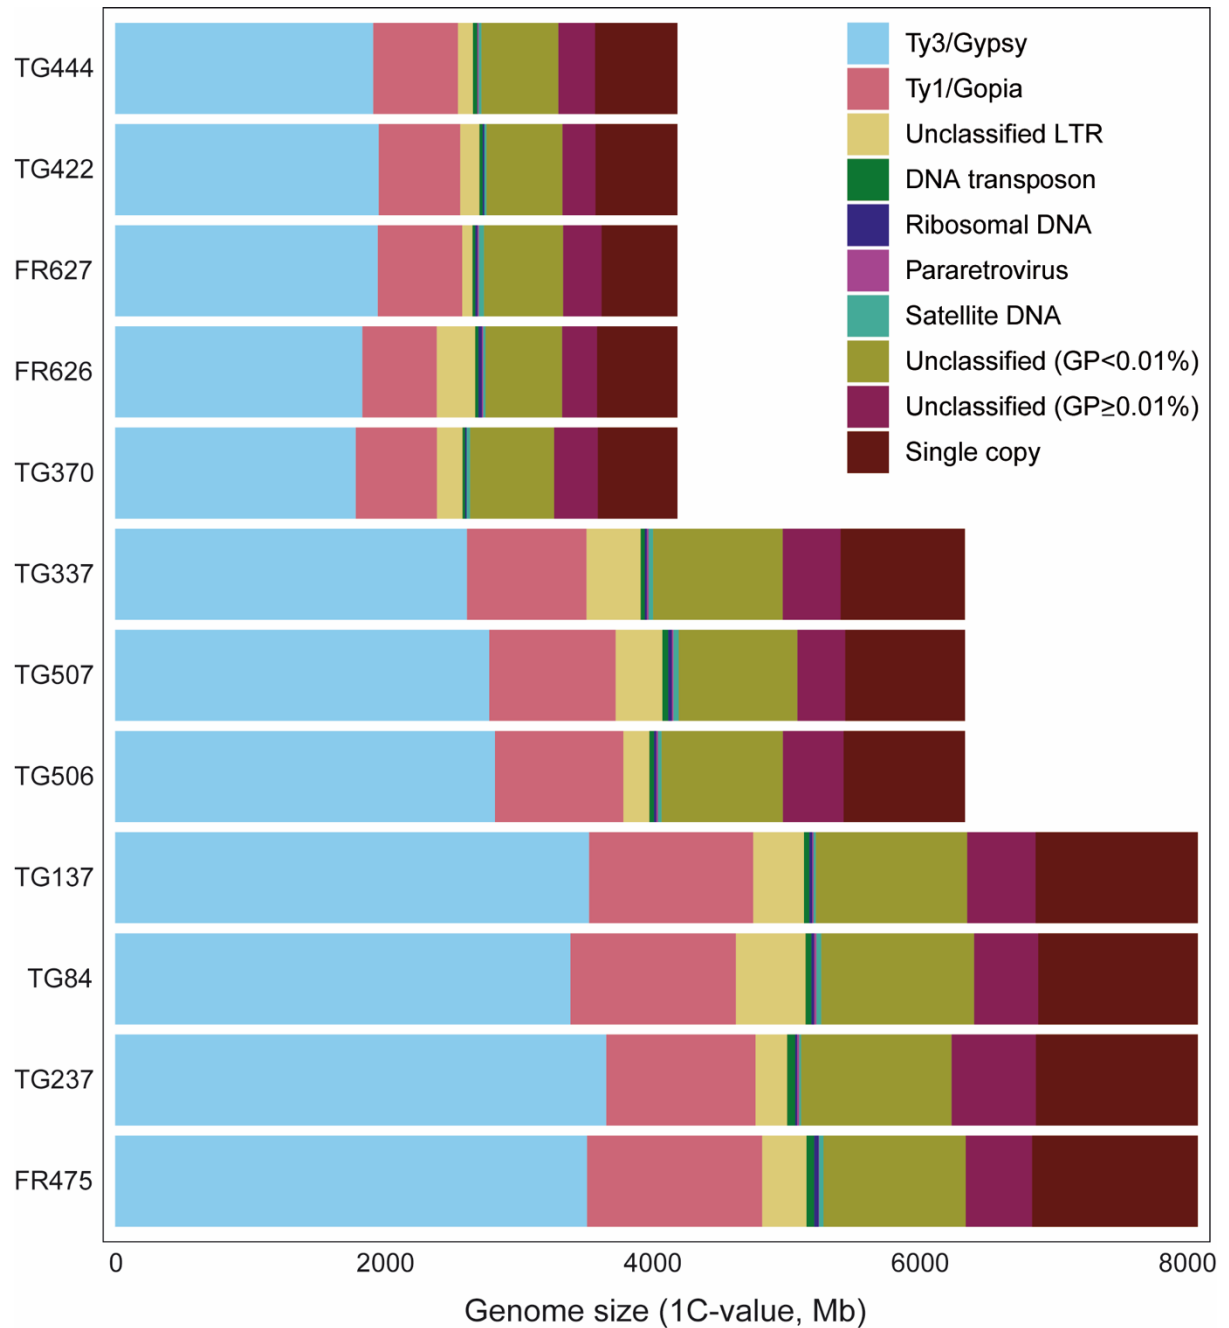

**Supplementary Figure S1.** Genomic composition of all *Senecio doricum* accessions across cytotypes (4x, 6x and 8x). Estimates of the genomic abundances (in Mb/1C) of different repeats are indicated and colored by repeat class [GP = Genome proportion (%), LTR = Long Terminal Repeat].

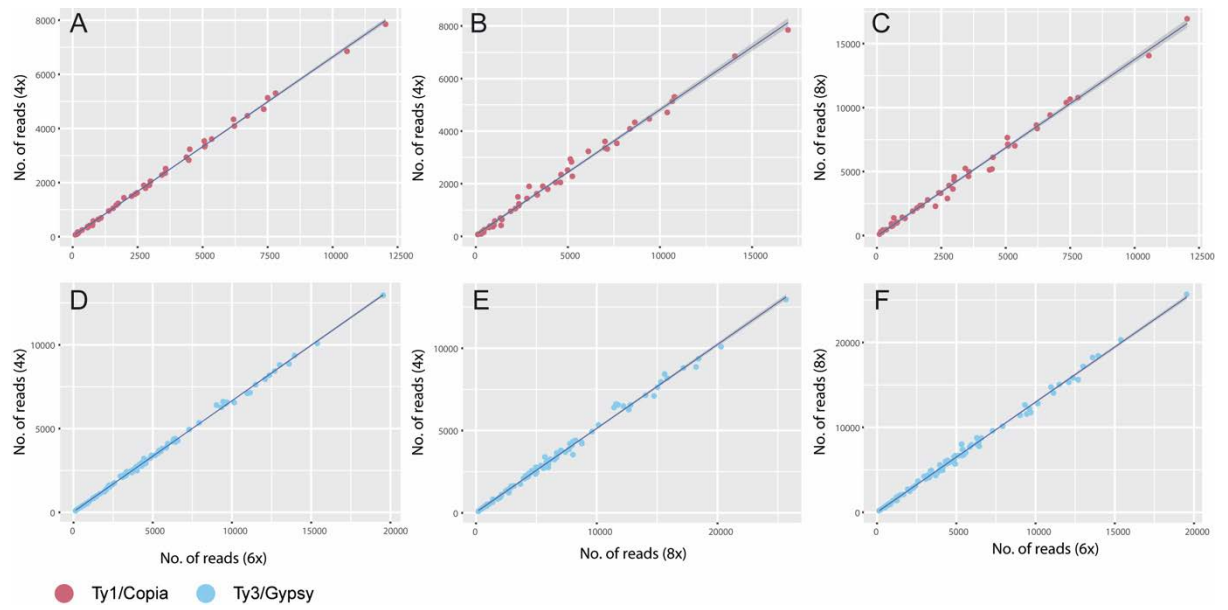

**Supplementary Figure S2.** Pairwise scatterplot comparisons of the number of reads included in repeat clusters from each cytotype. The slope indicates the genome size ratio between each cytotype. (A–C) Ty1/Copia. (D–F) Ty3/Gypsy.
