# Supplementary material for: Genome Insights into Autopolyploid Evolution: A Case Study in Senecio doronicum (Asteraceae) from the Southern Alps
Source: Plants (Basel). 2022 May 2;11(9):1235. doi: 10.3390/plants11091235 (PMC9099586; doi:10.3390/plants11091235)
Supplement: Supplementary file 1 [file plants-11-01235-s001.zip › Supplementary Table S4.xlsx]

## Sheet: Hoja1
Supplementary Table S4. Repetitive DNA composition estimated in individuals of Senecio doronicum across cytotypes.
ANNOTATION OF TG84 - 8x							ANNOTATION OF TG137 - 8x							ANNOTATION OF TG237 - 8x							ANNOTATION OF FR475 - 8x
Sequence type/Repeat type	No. of clusters	No. of superclusters	No. of reads	Genome proportion (%)	Total length (Mbp/1C)		Sequence type/Repeat type	No. of clusters	No. of superclusters	No. of reads	Genome proportion (%)	Total length (Mbp/1C)		Sequence type/Repeat type	No. of clusters	No. of superclusters	No. of reads	Genome proportion (%)	Total length (Mbp/1C)		Sequence type/Repeat type	No. of clusters	No. of superclusters	No. of reads	Genome proportion (%)	Total length (Mbp/1C)
Ty1/Copia	52	52	183391	15.2826	1237.56		Ty1/Copia	47	47	181987	15.1656	1228.08		Ty1/Copia	41	41	165496	13.7913	1116.8		Ty1/Copia	55	55	193988	16.1657	1309.07
Ale	2	2	416	0.0346667	2.80725		Ale	2	2	707	0.0589167	4.77098		Ale	3	3	856	0.0713333	5.77646		Ale	3	3	466	0.0388333	3.14466
Angela	5	5	11385	0.94875	76.8283		Angela	3	3	11044	0.920333	74.5271		Angela	4	4	10616	0.884667	71.6389		Angela	4	4	10612	0.884333	71.6119
Bianca	4	4	3664	0.305333	24.7254		Bianca	3	3	916	0.0763333	6.18135		Bianca	2	2	616	0.0513333	4.15689		Bianca	3	3	673	0.0560833	4.54154
Ikeros	1	1	2281	0.190083	15.3926		Ikeros	2	2	2321	0.193417	15.6626		Ikeros	1	1	2143	0.178583	14.4614		Ikeros	1	1	2144	0.178667	14.4681
SIRE	26	26	150722	12.5602	1017.1		SIRE	28	28	153764	12.8137	1037.63		SIRE	27	27	148453	12.3711	1001.79		SIRE	31	31	164045	13.6704	1107.01
TAR	5	5	1706	0.142167	11.5124		TAR	3	3	1814	0.151167	12.2412		TAR	2	2	2142	0.1785	14.4546		TAR	5	5	1609	0.134083	10.8579
Tork	2	2	681	0.05675	4.59552		Tork	1	1	834	0.0695	5.628		Tork	2	2	670	0.0558333	4.52129		Tork	2	2	448	0.0373333	3.02319
Ty1/Copia	7	7	12536	1.04467	84.5954		Ty1/Copia	5	5	10587	0.88225	71.4432		Ty3/Gypsy	86	86	544303	45.3586	3673.07		Ty1/Copia	6	6	13991	1.16592	94.4141
Ty3/Gypsy	81	81	504741	42.0618	3406.09		Ty3/Gypsy	82	82	525293	43.7744	3544.78		Athila	7	7	20485	1.70708	138.237		Ty3/Gypsy	82	82	523129	43.5941	3530.18
Athila	3	3	4870	0.405833	32.8637		Athila	4	4	4844	0.403667	32.6883		CRM	1	1	3267	0.27225	22.0464		Athila	7	7	14776	1.23133	99.7114
CRM	1	1	4363	0.363583	29.4424		CRM	2	2	4636	0.386333	31.2847		Retand	8	8	16080	1.34	108.511		CRM	1	1	4508	0.375667	30.4209
Retand	7	7	12665	1.05542	85.466		Retand	5	5	17410	1.45083	117.486		Tekay	69	69	504340	42.0283	3403.39		Retand	6	6	19037	1.58642	128.465
Tekay	65	65	468873	39.0728	3164.05		Tekay	65	65	482901	40.2418	3258.71		Ty3/Gypsy	1	1	131	0.0109167	0.884014		Tekay	68	68	484808	40.4007	3271.58
Ty3/Gypsy	5	5	13970	1.16417	94.2724		Ty3/Gypsy	6	6	15502	1.29183	104.611		LTR	13	13	34991	2.91592	236.126		LTR	11	11	49115	4.09292	331.438
LTR	18	18	77006	6.41717	519.652		LTR	14	14	56105	4.67542	378.608		Pararetrovirus	2	2	2550	0.2125	17.2079		Pararetrovirus	1	1	369	0.03075	2.49009
Pararetrovirus	1	1	2624	0.218667	17.7073		Pararetrovirus	2	2	1450	0.120833	9.78489		DNA_transposon	7	7	9001	0.750083	60.7405		DNA_transposon	6	6	8755	0.729583	59.0805
DNA_transposon	6	6	6686	0.557167	45.1185		DNA_transposon	7	7	6116	0.509667	41.272		TIR/haT	2	2	2166	0.1805	14.6166		TIR/haT	2	2	1914	0.1595	12.9161
TIR/haT	2	2	2018	0.168167	13.6179		TIR/haT	2	2	2035	0.169583	13.7326		TIR/MuDR-Mutator	4	4	6556	0.546333	44.2412		TIR/MuDR-Mutator	3	3	6387	0.53225	43.1008
TIR/MuDR-Mutator	3	3	4024	0.335333	27.1548		TIR/MuDR-Mutator	4	4	3835	0.319583	25.8793		TIR/PIF_Harbinger	1	1	279	0.02325	1.88275		TIR/PIF_Harbinger	1	1	454	0.0378333	3.06368
TIR/PIF_Harbinger	1	1	644	0.0536667	4.34584		TIR/PIF_Harbinger	1	1	246	0.0205	1.66006		rDNA	3	3	1880	0.156667	12.6866		rDNA	3	3	4733	0.394417	31.9392
rDNA	3	3	2959	0.246583	19.9679		rDNA	3	3	3038	0.253167	20.501		Satellite	4	4	2286	0.1905	15.4264		Satellite	6	6	5141	0.428417	34.6925
Satellite	7	7	5440	0.453333	36.7102		Satellite	2	2	2734	0.227833	18.4496		Unclassified repeats	116	116	93586	7.79883	631.537		Unknown	107	107	73667	6.13892	497.12
Unclassified repeats	113	113	71254	5.93783	480.836		Unclassified repeats	103	103	76034	6.33617	513.093		Unclassified repeats (GP<0.01%)			166580	13.8817	1124.12		Unclassified repeats (GP<0.01%)			157557	13.1297	1063.23
Unclassified repeats (GP<0.01%)			169181	14.0984	1141.67		Unclassified repeats (GP<0.01%)			167562	13.9635	1130.74		Single			179327	14.9439	1210.13		Single			183546	15.2955	1238.61
Single			176718	14.7265	1192.53		Single			179681	14.9734	1212.52
ANNOTATION OF TG337R - 6x							ANNOTATION O TG506 - 6x							ANNOTATION OF TG507 - 6x
Sequence type/Repeat type	No. of clusters	No. of superclusters	No. of reads	Genome proportion (%)	Total length (Mbp/1C)		Sequence type/Repeat type	No. of clusters	No. of superclusters	No. of reads	Genome proportion (%)	Total length (Mbp/1C)		Sequence type/Repeat type	No. of clusters	No. of superclusters	No. of reads	Genome proportion (%)	Total length (Mbp/1C)
Ty1/Copia	44	44	169048	14.0873	895.532		Ty1/Copia	56	56	181337	15.1114	960.633		Ty1/Copia	48	48	178345	14.8621	944.783
Ale	2	2	474	0.0395	2.51101		Ale	6	6	1067	0.0889167	5.65243		Ale	1	1	155	0.0129167	0.821113
Angela	5	5	8890	0.740833	47.0948		Angela	6	6	11600	0.966667	61.451		Angela	7	7	13334	1.11117	70.6369
Bianca	3	3	532	0.0443333	2.81827		Bianca	2	2	589	0.0490833	3.12023		Bianca	3	3	753	0.06275	3.98902
Ikeros	1	1	2346	0.1955	12.4279		Ikeros	2	2	2356	0.196333	12.4809		Ikeros	1	1	2344	0.195333	12.4173
SIRE	29	29	152114	12.6762	805.824		SIRE	27	27	152686	12.7238	808.854		SIRE	31	31	157335	13.1113	833.482
TAR	1	1	767	0.0639167	4.06318		TAR	4	4	1502	0.125167	7.95685		TAR	2	2	1214	0.101167	6.43117
Tork	1	1	226	0.0188333	1.19724		Tork	2	2	402	0.0335	2.1296		Tork	2	2	468	0.039	2.47923
Ty1/Copia	2	2	3699	0.30825	19.5955		Ty1/Copia	7	7	11135	0.927917	58.9877		Ty1/Copia	1	1	2742	0.2285	14.5257
Ty3/Gypsy	84	84	496666	41.3888	2631.09		Ty3/Gypsy	79	79	536293	44.6911	2841.01		Ty3/Gypsy	82	82	528284	44.0237	2798.58
Athila	8	8	16826	1.40217	89.1357		Athila	5	5	19468	1.62233	103.132		Athila	8	8	19169	1.59742	101.548
CRM	1	1	1932	0.161	10.2348		CRM	2	2	4621	0.385083	24.4797		CRM	2	2	4995	0.41625	26.461
Retand	6	6	5950	0.495833	31.5201		Retand	4	4	10481	0.873417	55.5231		Retand	5	5	16755	1.39625	88.7596
Tekay	69	69	471958	39.3298	2500.2		Tekay	68	68	501723	41.8103	2657.88		Tekay	67	67	487365	40.6138	2581.82
LTR	20	20	76223	6.35192	403.791		LTR	11	11	36463	3.03858	193.163		LTR	13	13	65863	5.48858	348.909
Pararetrovirus	2	2	2763	0.23025	14.637		Pararetrovirus	3	3	2779	0.231583	14.7218		Pararetrovirus	2	2	2629	0.219083	13.9271
DNA_transposon	6	6	5897	0.491417	31.2394		DNA_transposon	6	6	6754	0.562833	35.7793		DNA_transposon	6	6	8481	0.70675	44.9281
Helitron	1	1	143	0.0119167	0.757543		TIR/haT	2	2	2022	0.1685	10.7115		TIR/haT	2	2	1888	0.157333	10.0017
TIR/haT	2	2	1798	0.149833	9.52491		TIR/MuDR-Mutator	3	3	4601	0.383417	24.3738		TIR/MuDR-Mutator	3	3	5914	0.492833	31.3294
TIR/MuDR-Mutator	2	2	3709	0.309083	19.6484		TIR/PIF_Harbinger	1	1	131	0.0109167	0.693972		TIR/PIF_Harbinger	1	1	679	0.0565833	3.597
TIR/PIF_Harbinger	1	1	247	0.0205833	1.30848		rDNA	3	3	2915	0.242917	15.4422		rDNA	4	4	4786	0.398833	25.3538
rDNA	3	3	2636	0.219667	13.9642		Satellite	6	6	5023	0.418583	26.6093		Satellite	7	7	7392	0.616	39.1591
Satellite	7	7	6418	0.534833	33.9994		Unclassified repeats	128	128	85983	7.16525	455.495		Unclassified repeats	110	110	67732	5.64433	358.81
Unclassified repeats	113	113	81846	6.8205	433.579		Unclassified repeats (GP<0.01%)			171087	14.2573	906.333		Unclassified repeats (GP<0.01%)			167383	13.9486	886.711
Unclassified repeats (GP<0.01%)			182914	15.2428	968.987		Single			171366	14.2805	907.811		Single			169105	14.0921	895.834
Single			175435	14.6196	929.367
ANNOTATION OF TG370 - 4x							ANNOTATION OF TG422 - 4x							ANNOTATION OF TG444 - 8x							ANNOTATION OF FR626 - 4x							ANNOTATION OF FR627 - 4x
Sequence type/Repeat type	No. of clusters	No. of superclusters	No. of reads	Genome proportion (%)	Total length (Mbp/1C)		Sequence type/Repeat type	No. of clusters	No. of superclusters	No. of reads	Genome proportion (%)	Total length (Mbp/1C)		Sequence type/Repeat type	No. of clusters	No. of superclusters	No. of reads	Genome proportion (%)	Total length (Mbp/1C)		Sequence type/Repeat type	No. of clusters	No. of superclusters	No. of reads	Genome proportion (%)	Total length (Mbp/1C)		Sequence type/Repeat type	No. of clusters	No. of superclusters	No. of reads	Genome proportion (%)	Total length (Mbp/1C)
Ty1/Copia	43	43	173521	14.4601	608.104		Ty1/Copia	43	43	174176	14.5147	610.4		Ty1/Copia	47	47	181135	15.0946	634.788		Ty1/Copia	40	40	158912	13.2427	556.907		Ty1/Copia	43	43	180555	15.0463	632.755
Ale	1	1	212	0.0176667	0.742954		Ale	2	2	355	0.0295833	1.2441		Ale	2	2	385	0.0320833	1.34923		Ale	2	2	349	0.0290833	1.22307		Angela	5	5	13153	1.09608	46.0947
Angela	5	5	12113	1.00942	42.45		Angela	4	4	11689	0.974083	40.9641		Angela	4	4	12613	1.05108	44.2023		Angela	5	5	14019	1.16825	49.1296		Ikeros	1	1	1916	0.159667	6.71462
Bianca	2	2	468	0.039	1.64011		Bianca	2	2	695	0.0579167	2.43563		Bianca	2	2	606	0.0505	2.12373		Bianca	2	2	370	0.0308333	1.29666		SIRE	27	27	149420	12.4517	523.642
Ikeros	1	1	2316	0.193	8.11642		Ikeros	1	1	2477	0.206417	8.68065		Ikeros	1	1	2448	0.204	8.57902		Ikeros	1	1	2072	0.172667	7.26132		TAR	2	2	1329	0.11075	4.65748
SIRE	28	28	145466	12.1222	509.786		SIRE	24	24	144252	12.021	505.531		SIRE	28	28	151398	12.6165	530.574		SIRE	26	26	137769	11.4808	482.811		Tork	1	1	843	0.07025	2.95429
TAR	1	1	936	0.078	3.28021		TAR	2	2	1325	0.110417	4.64346		TAR	1	1	807	0.06725	2.82813		TAR	1	1	1052	0.0876667	3.68673		Ty1/Copia	7	7	13894	1.15783	48.6915
Ty1/Copia	5	5	12010	1.00083	42.089		Tork	2	2	675	0.05625	2.36554		Tork	3	3	750	0.0625	2.62837		Tork	2	2	724	0.0603333	2.53726		Ty3/Gypsy	85	85	560346	46.6955	1963.73
Ty3/Gypsy	82	82	513362	42.7802	1799.08		Ty1/Copia	6	6	12708	1.059	44.5352		Ty1/Copia	6	6	12128	1.01067	42.5026		Ty1/Copia	1	1	2557	0.213083	8.96101		Athila	2	2	4527	0.37725	15.8649
Athila	8	8	19069	1.58908	66.8273		Ty3/Gypsy	90	90	562378	46.8648	1970.85		Ty3/Gypsy	81	81	550678	45.8898	1929.85		Ty3/Gypsy	80	80	527679	43.9733	1849.25		CRM	1	1	2442	0.2035	8.55799
CRM	1	1	4552	0.379333	15.9525		Athila	4	4	5532	0.461	19.3869		Athila	4	4	6145	0.512083	21.5352		Athila	4	4	5978	0.498167	20.9499		Retand	8	8	16526	1.37717	57.9154
Retand	8	8	16434	1.3695	57.593		CRM	2	2	4683	0.39025	16.4116		CRM	1	1	4718	0.393167	16.5342		CRM	1	1	5049	0.42075	17.6942		Tekay	71	71	527339	43.9449	1848.06
Tekay	62	62	457782	38.1485	1604.3		Retand	10	10	11547	0.96225	40.4665		Retand	7	7	17170	1.43083	60.1723		Retand	7	7	17287	1.44058	60.5823		Ty3/Gypsy	3	3	9512	0.792667	33.3348
Ty3/Gypsy	3	3	15525	1.29375	54.4074		Tekay	70	70	526147	43.8456	1843.88		Tekay	65	65	508687	42.3906	1782.69		Tekay	64	64	485637	40.4697	1701.91		LTR	9	9	21362	1.78017	74.8631
LTR	11	11	54141	4.51175	189.737		Ty3/Gypsy	4	4	14469	1.20575	50.7066		Ty3/Gypsy	4	4	13958	1.16317	48.9158		Ty3/Gypsy	4	4	13728	1.144	48.1098		Pararetrovirus	2	2	3061	0.255083	10.7273
DNA_transposon	6	6	6072	0.506	21.2793		LTR	14	14	40693	3.39108	142.609		LTR	9	9	31708	2.64233	111.121		LTR	18	18	81492	6.791	285.589		DNA_transposon	7	7	6511	0.542583	22.8178
TIR/haT	3	3	2039	0.169917	7.14568		Pararetrovirus	1	1	132	0.011	0.462594		Pararetrovirus	1	1	2798	0.233167	9.80559		Pararetrovirus	2	2	2984	0.248667	10.4574		Helitron	1	1	139	0.0115833	0.487125
TIR/MuDR-Mutator	2	2	3741	0.31175	13.1103		DNA_transposon	6	6	7288	0.607333	25.5408		DNA_transposon	7	7	9063	0.75525	31.7613		DNA_transposon	6	6	7375	0.614583	25.8457		TIR/haT	2	2	1946	0.162167	6.81976
TIR/PIF_Harbinger	1	1	292	0.0243333	1.02331		TIR/haT	2	2	2165	0.180417	7.58724		Helitron	1	1	155	0.0129167	0.543197		Helitron	1	1	163	0.0135833	0.571233		TIR/MuDR-Mutator	3	3	3685	0.307083	12.9141
rDNA	2	2	3041	0.253417	10.6572		TIR/MuDR-Mutator	3	3	4768	0.397333	16.7095		TIR/haT	2	2	2098	0.174833	7.35244		TIR/haT	2	2	2192	0.182667	7.68186		TIR/PIF_Harbinger	1	1	741	0.06175	2.59683
Satellite	7	7	7376	0.614667	25.8492		TIR/PIF_Harbinger	1	1	355	0.0295833	1.2441		TIR/MuDR-Mutator	3	3	6068	0.505667	21.2653		TIR/MuDR-Mutator	2	2	4285	0.357083	15.0168		rDNA	4	4	4427	0.368917	15.5144
Unclassified repeats	135	135	93742	7.81183	328.519		rDNA	4	4	3357	0.27975	11.7646		TIR/PIF_Harbinger	1	1	742	0.0618333	2.60034		TIR/PIF_Harbinger	1	1	735	0.06125	2.57581		Satellite	9	9	10767	0.89725	37.733
Unclassified repeats (GP<0.01%)			179267	14.9389	628.241		Satellite	6	6	4462	0.371833	15.6371		rDNA	1	1	274	0.0228333	0.960233		rDNA	5	5	6901	0.575083	24.1846		Unclassified repeats	98	98	82737	6.89475	289.952
Single			169318	14.1098	593.375		Unclassified repeats	99	99	71099	5.92492	249.166		Satellite	7	7	6004	0.500333	21.041		Satellite	7	7	5149	0.429083	18.0447		Unclassified repeats (GP<0.01%)			168633	14.053	590.974
							Unclassified repeats (GP<0.01%)			161853	13.4878	567.214		Unclassified repeats	109	109	78695	6.55792	275.787		Unclassified repeats	110	110	74671	6.22258	261.685		Single			161601	13.467	566.331
							Single			174562	14.5468	611.753		Unclassified repeats (GP<0.01%)			163986	13.6655	574.689		Unclassified repeats (GP<0.01%)			163364	13.6137	572.509
														Single			175659	14.6382	615.597		Single			171473	14.2894	600.927
